# Supplementary figures and images for: Targeting S1PR1 May Result in Enhanced Migration of Cancer Cells in Bladder Carcinoma
Source: MDPI journal article supplement (doi:10.3390/cancers13174474), 2021-09-05

C

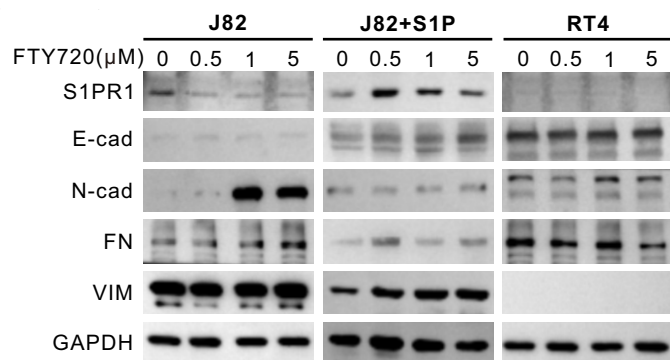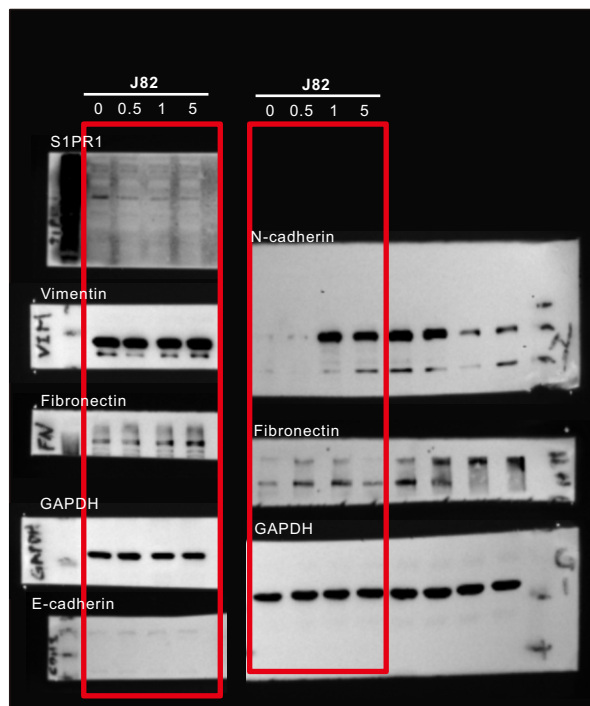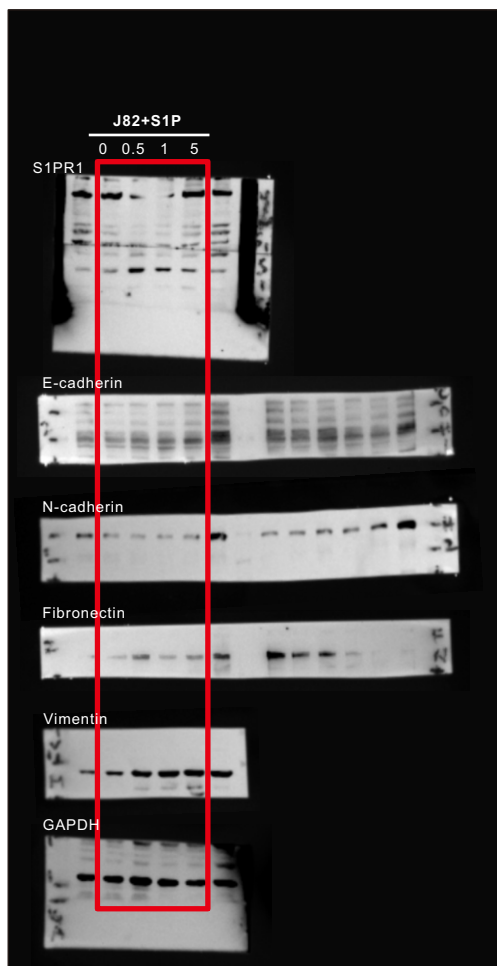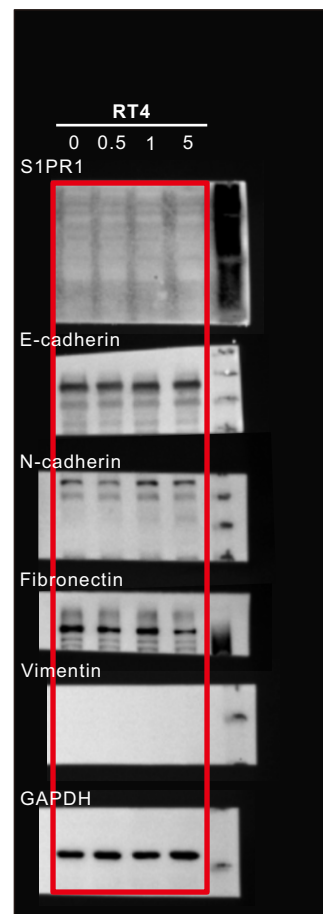

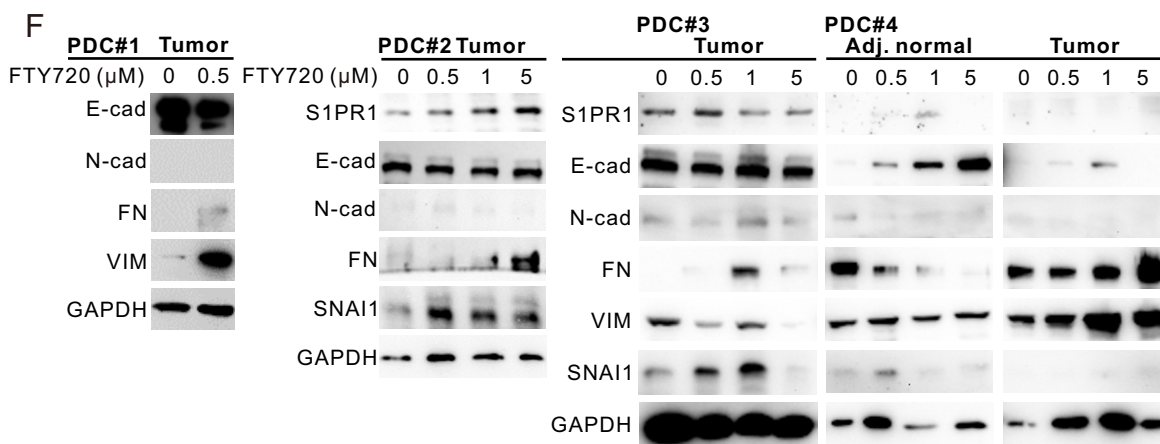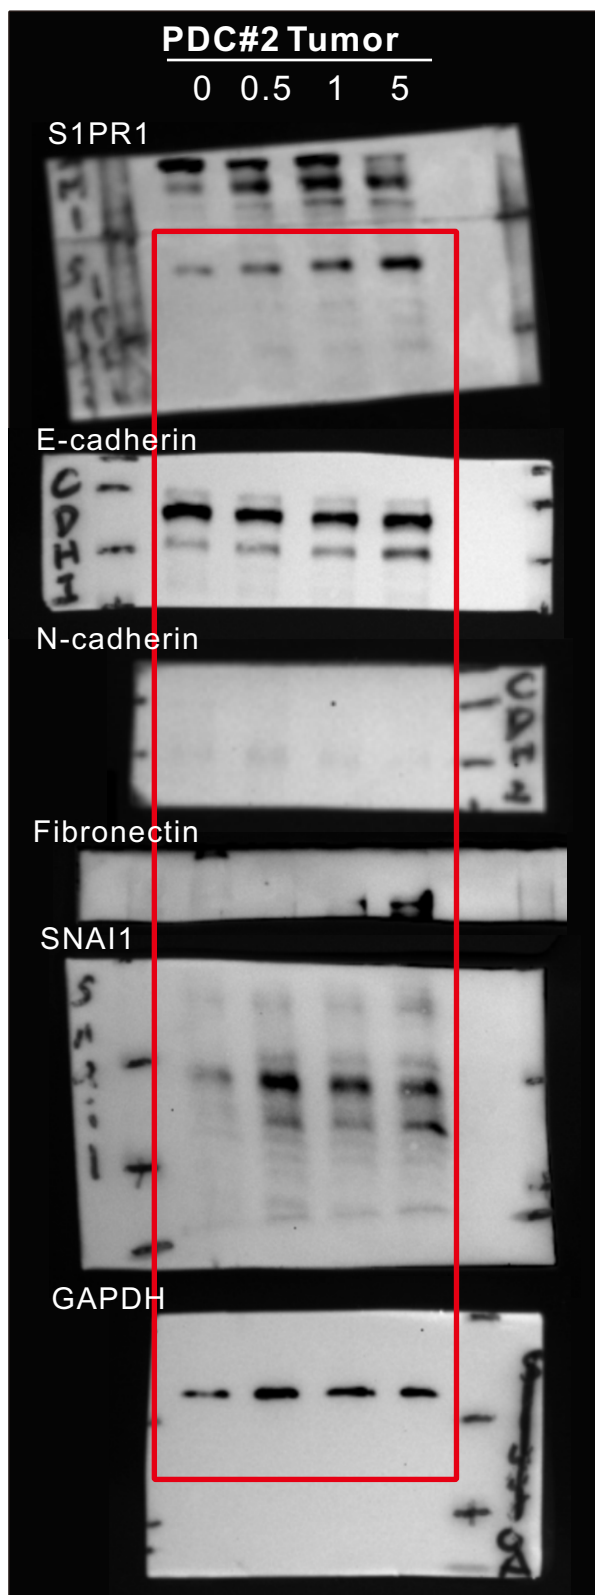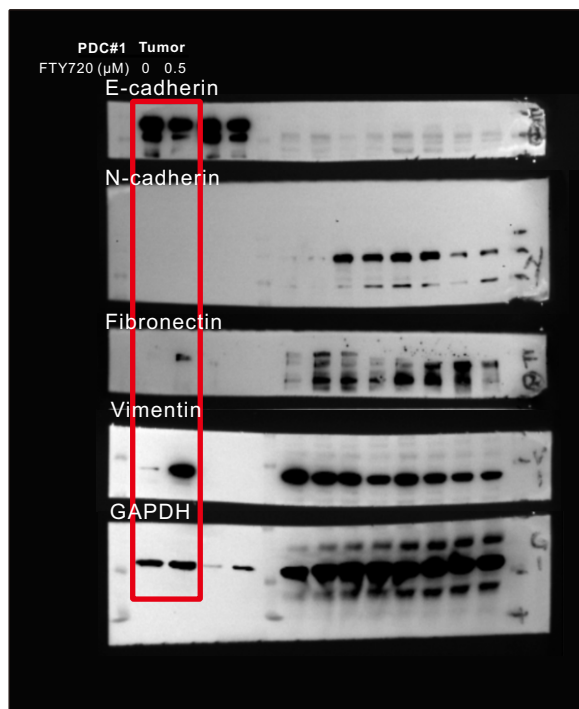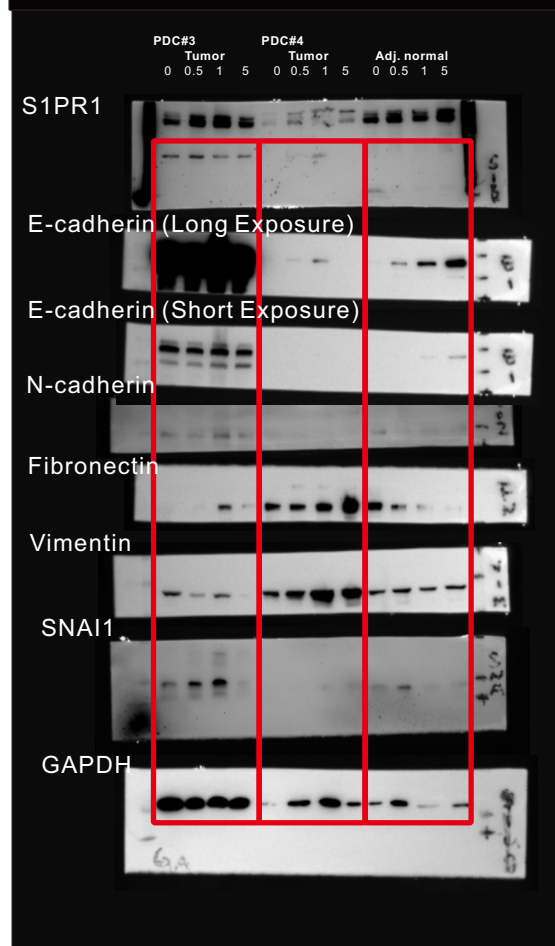

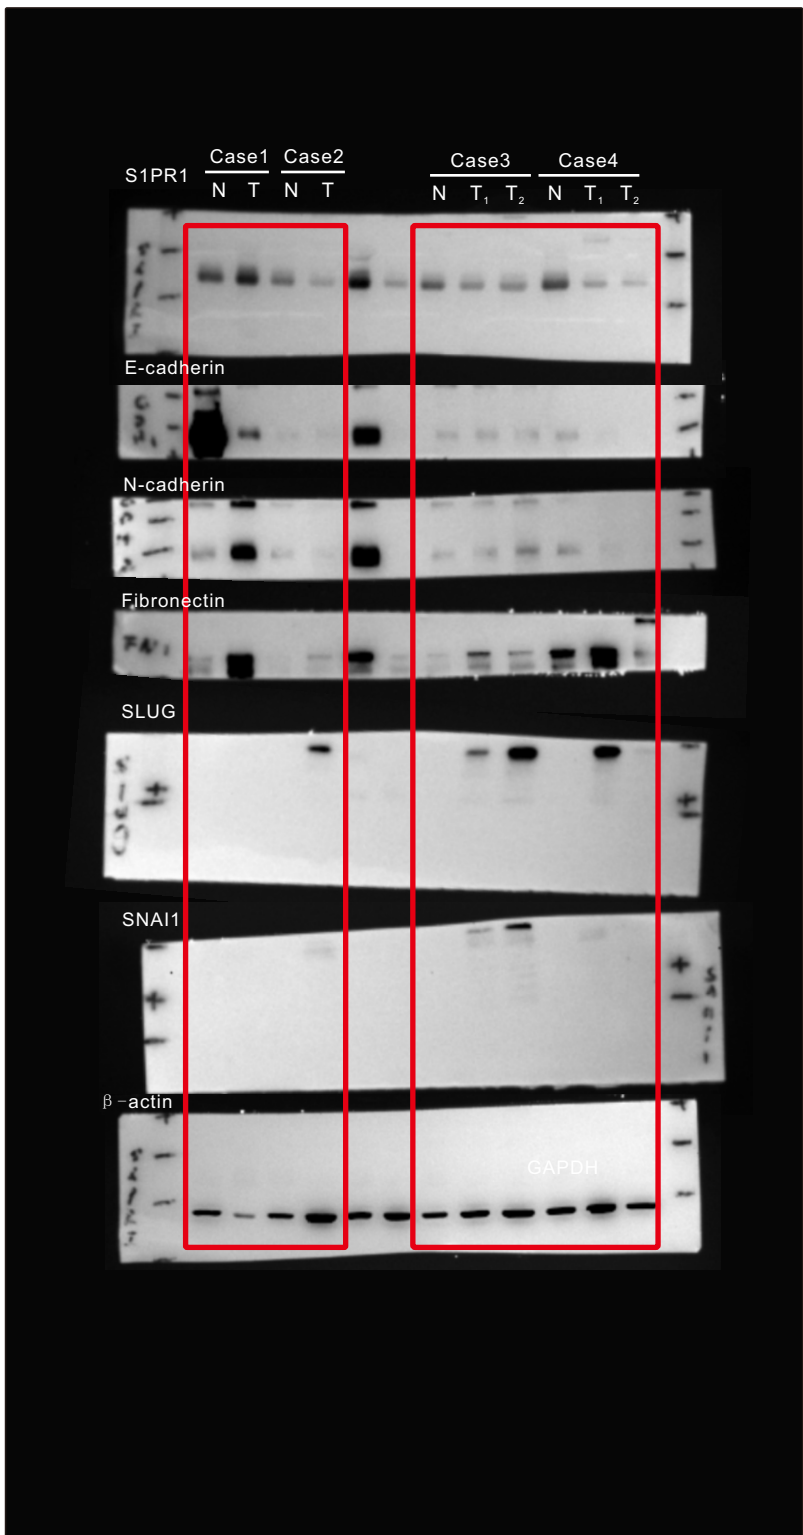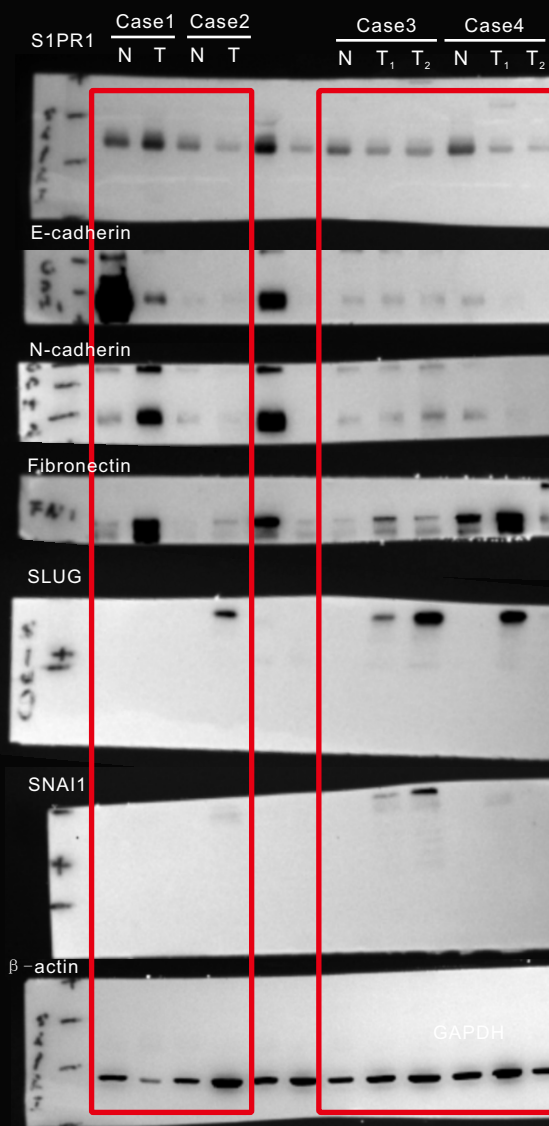

A

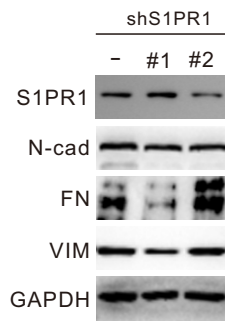

D

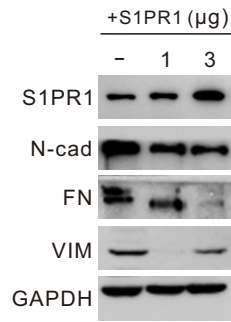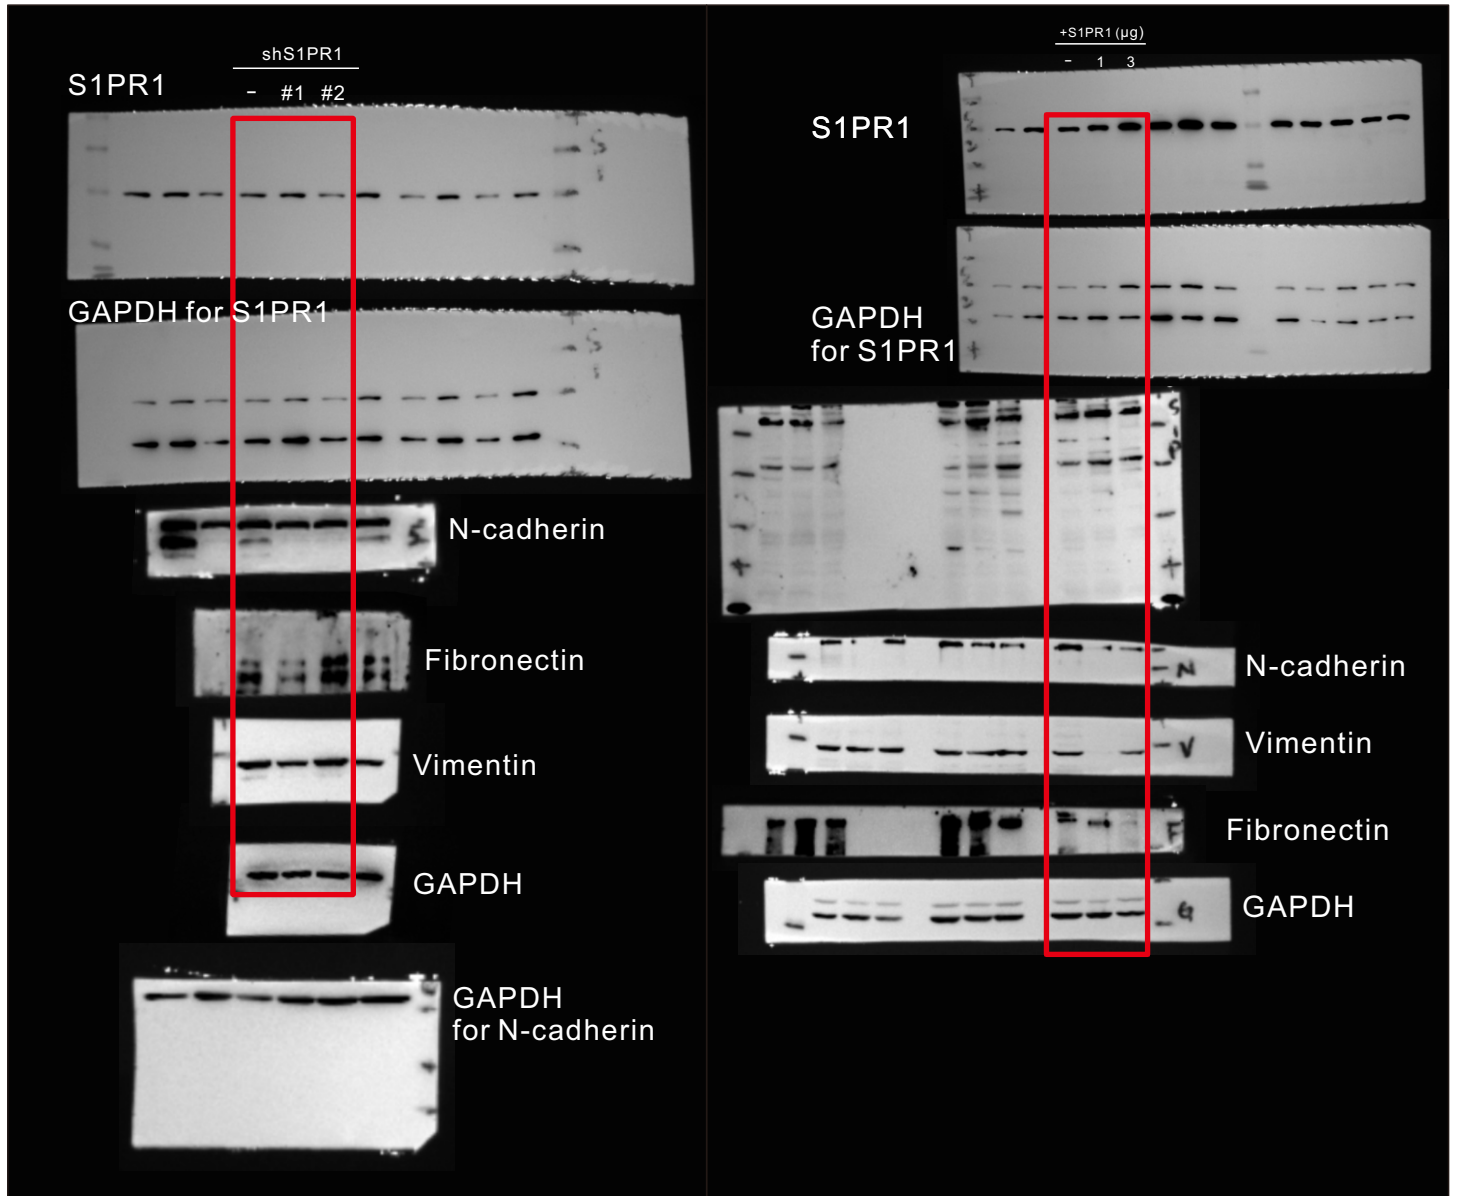

Supplement: s1 [file s1]
